# Supplementary material for: Molecular characterization of virulence factors and antimicrobial susceptibility of thermophilic Campylobacter species associated with human clinical infections in Rwanda
Source: Research Square preprint supplement (doi:10.21203/rs.3.rs-7843102/v1), 2025-12-18
Supplement: Supplementary file 1 [file 39c1587115aef95ba34dbc4e.pdf]

**Appendix II: Questionnaire for data collection on genetic and human factors in  
*Campylobacter* study**

**Title of the study:** *"Molecular characterization of antimicrobial resistant Campylobacter strains from human and chicken feces in Musanze District"*

**Participant ID No:** \_\_\_\_\_

| Section I:                          | Questions                                                                                        | Response                                                                                                                                                                                                                                         |
|-------------------------------------|--------------------------------------------------------------------------------------------------|--------------------------------------------------------------------------------------------------------------------------------------------------------------------------------------------------------------------------------------------------|
| <b>Demographics information</b>     | 1. Age:                                                                                          | Years:                                                                                                                                                                                                                                           |
|                                     | 2. Gender                                                                                        | <input type="checkbox"/> Male<br><input type="checkbox"/> Female<br><input type="checkbox"/> Other                                                                                                                                               |
|                                     | 3. Occupation                                                                                    | <input type="checkbox"/> Student<br><input type="checkbox"/> Farmer<br><input type="checkbox"/> Health worker<br><input type="checkbox"/> Butcher<br><input type="checkbox"/> Poultry handler<br><input type="checkbox"/> Other (please specify) |
| <b>Section II: Medical history:</b> | 1. Have you experienced any of the following symptoms in the past 7 days? (Check all that apply) | <input type="checkbox"/> Diarrhea<br><input type="checkbox"/> Abdominal pain<br><input type="checkbox"/> Nausea or vomiting<br><input type="checkbox"/> Fever<br><input type="checkbox"/> Blood in stools<br><input type="checkbox"/> None       |
|                                     | 2. Have you been diagnosed with any gastrointestinal diseases?                                   | <input type="checkbox"/> Yes<br><input type="checkbox"/> No<br>If yes, please specify:.....                                                                                                                                                      |

|                                              |                                                                                 |                                                                                                                                                                                                              |
|----------------------------------------------|---------------------------------------------------------------------------------|--------------------------------------------------------------------------------------------------------------------------------------------------------------------------------------------------------------|
|                                              | 3. Have you recently taken any antibiotics (within the last 14 days)?           | <input type="checkbox"/> Yes<br><input type="checkbox"/> No<br>If yes, specify the antibiotic and duration<br>.....                                                                                          |
| <b>Section III:<br/>Dietary<br/>Habits:</b>  | 1. Do you consume chicken products?                                             | <input type="checkbox"/> Yes<br><input type="checkbox"/> No<br><input type="checkbox"/> If yes, go to next questions                                                                                         |
|                                              | 2. How often do you consume chicken products (e.g., chicken, eggs)?             | <input type="checkbox"/> Daily<br><input type="checkbox"/> Several times a week<br><input type="checkbox"/> Once a week<br><input type="checkbox"/> Less than once a week<br><input type="checkbox"/> Rarely |
|                                              | 3. How do you prefer your chicken cooked?                                       | <input type="checkbox"/> Grilled<br><input type="checkbox"/> Fried<br><input type="checkbox"/> Boiled                                                                                                        |
|                                              |                                                                                 |                                                                                                                                                                                                              |
| <b>Section IV:<br/>Hygiene<br/>Practices</b> | 1. How often do you wash your hands before eating or preparing food?            | <input type="checkbox"/> Always<br><input type="checkbox"/> Sometimes<br><input type="checkbox"/> Never                                                                                                      |
|                                              | 2. How do you usually handle raw chicken before cooking? (Check all that apply) | <input type="checkbox"/> Wash with water<br><input type="checkbox"/> Handle with bare hands<br><input type="checkbox"/> Wear gloves<br><input type="checkbox"/> Other<br>(Please specify): .....             |

|                                             |                                                                                                    |                                                                                                                                                                                                                                 |
|---------------------------------------------|----------------------------------------------------------------------------------------------------|---------------------------------------------------------------------------------------------------------------------------------------------------------------------------------------------------------------------------------|
|                                             | 3. Do you wash your utensils and cooking surfaces after handling raw chicken?                      | <input type="checkbox"/> Yes<br><input type="checkbox"/> No                                                                                                                                                                     |
| <b>Section V:<br/>Water and Sanitation</b>  | 1. What is the main source of drinking water in your household?                                    | <input type="checkbox"/> Tap water<br><input type="checkbox"/> Borehole water<br><input type="checkbox"/> River or lake water<br><input type="checkbox"/> Bottled water<br><input type="checkbox"/> other (please specify)..... |
|                                             | 2. Do you treat drinking water before consumption?                                                 | <input type="checkbox"/> Yes<br><input type="checkbox"/> No<br><input type="checkbox"/> If yes, how?                                                                                                                            |
|                                             | 3. Do you have access to proper sanitation facilities (e.g., latrines, flush toilets)?             | <input type="checkbox"/> Yes<br><input type="checkbox"/> No                                                                                                                                                                     |
|                                             | 4. Is there a separate area for handling or slaughtering poultry in your home?                     | <input type="checkbox"/> Yes<br><input type="checkbox"/> No                                                                                                                                                                     |
|                                             | 5. Do you practice proper waste disposal (e.g., waste is disposed of in designated bins or area )? | <input type="checkbox"/> Yes<br><input type="checkbox"/> No                                                                                                                                                                     |
| <b>Section VI:<br/>Contact with animals</b> | 1. Do you have direct contact with chicken (e.g., handling, feeding, slaughtering)?                | <input type="checkbox"/> Yes<br><input type="checkbox"/> No                                                                                                                                                                     |

|                                              |                                                                                               |                                                                                                                                                            |
|----------------------------------------------|-----------------------------------------------------------------------------------------------|------------------------------------------------------------------------------------------------------------------------------------------------------------|
|                                              | 2. Do you live in close proximity to chicken farms ?                                          | <input type="checkbox"/> Yes<br><input type="checkbox"/> No                                                                                                |
|                                              | 3. Have you or anyone in your household experienced foodborne illness after handling chicken? | <input type="checkbox"/> Yes<br><input type="checkbox"/> No                                                                                                |
|                                              | 4. Do you keep chickens in your household or compound?                                        | <input type="checkbox"/> Yes<br><input type="checkbox"/> No                                                                                                |
| <b>Section VII:<br/>milk<br/>consumption</b> | 1. How often do you consume milk?                                                             | <input type="checkbox"/> Daily<br><input type="checkbox"/> Several times a week<br><input type="checkbox"/> Occasionally<br><input type="checkbox"/> never |
|                                              | 2. What is the main types of milk consumed in your household?                                 | <input type="checkbox"/> Raw (unpasteurized) milk<br><input type="checkbox"/> Pasteurized milk<br><input type="checkbox"/> Boiled milk                     |

**Laboratory Notes:**

General notes and observations:

.....

.....

.....

.....

.....

.....

.....

Campylobacter species identified: .....

**Determination of virulence factors**

| Virulence gene factor | +Ve | -Ve | Other notes |
|-----------------------|-----|-----|-------------|
| <i>flaA</i>           |     |     |             |
| <i>cadF</i>           |     |     |             |
| <i>cdtA</i>           |     |     |             |
| <i>cdtB</i>           |     |     |             |
| <i>cdtC</i>           |     |     |             |

**Antimicrobial susceptibility findings:**

| Drug (disc strength)   | Zone diameter (mm) | Sensitive | Intermediate | Resistant |
|------------------------|--------------------|-----------|--------------|-----------|
| Ciprofloxacin (5µg)    |                    |           |              |           |
| Erythromycin (15µg)    |                    |           |              |           |
| Tetracycline (30µg)    |                    |           |              |           |
| Gentamycin (10µg)      |                    |           |              |           |
| Chloramphenicol (30µg) |                    |           |              |           |

MDR /not ..... (*resistance to 3 or more drugs*)

Additional notes:

.....  
.....  
.....  
.....  
.....
